# Supplementary material for: Polarity mediates asymmetric trafficking of the Gβ heterotrimeric G-protein subunit GPB-1 inC. elegansembryos
Source: Oxford University Press journal article supplement (doi:10.1242/dev.063354), 2011-06-07
Supplement: dev063354tables1.pdf [file dev063354tables1.pdf]

**Table S1. Fluorescence intensity of GPB-1 at the cell membrane**

| Cell cycle stage | <i>n</i> | A<br>(cortex/cytoplasm) | P<br>(cortex/cytoplasm) | Average of<br>A and P<br>(cortex/cytoplasm) | P-value* |                        |
|------------------|----------|-------------------------|-------------------------|---------------------------------------------|----------|------------------------|
|                  |          |                         |                         |                                             | A vs P   | Average vs<br>prophase |
| Interphase       | 13       | 1.82±0.15               | 2.65±0.20               | 2.23±0.30                                   | <0.001   | ~0.4                   |
| Prophase         | 10       | 2.29±0.23               | 2.46±0.39               | 2.37±0.32                                   | ~0.5     | N/A                    |
| Metaphase        | 11       | 1.77±0.24               | 1.73±0.19               | 1.75±0.21                                   | ~0.8     | <0.001                 |
| Anaphase         | 15       | 1.57±0.17               | 1.72±0.22               | 1.65±0.20                                   | ~0.3     | <0.001                 |
| Cytokinesis      | 11       | 1.74±0.19               | 2.30±0.34               | 2.02±0.32                                   | <0.01    | <0.05                  |

\*Student's *t*-test.

A, anterior; P, posterior.

Data are mean±s.e.m.
