# Supplementary material for: Polarity mediates asymmetric trafficking of the Gβ heterotrimeric G-protein subunit GPB-1 inC. elegansembryos
Source: Oxford University Press journal article supplement (doi:10.1242/dev.063354), 2011-06-07
Supplement: dev063354tables2.pdf [file dev063354tables2.pdf]

Table S2. Fluorescence intensity of GPR-1/2 at the cell membrane

| Wild type          |    |                         |                         |           |          |       |        |
|--------------------|----|-------------------------|-------------------------|-----------|----------|-------|--------|
| Cell cycle stage   | n  | A<br>(cortex/cytoplasm) | P<br>(cortex/cytoplasm) | P/A       | P-value* |       |        |
|                    |    |                         |                         |           | A        | P     | P/A    |
| Prophase           | 7  | 1.16±0.09               | 1.19±0.14               | 1.03±0.13 | <0.005   | ~0.03 | ~0.4   |
| Metaphase          | 10 | 1.07±0.08               | 1.26±0.13               | 1.18±0.09 | <0.001   | ~0.4  | <0.005 |
| Anaphase           | 16 | 1.64±0.12               | 1.55±0.12               | 0.96±0.08 | ~0.1     | ~0.6  | ~0.7   |
| Cytokinesis        | 25 | 1.34±0.07               | 1.61±0.17               | 1.21±0.11 | <0.005   | <0.09 | ~0.9   |
| <i>gpb-1(RNAi)</i> |    |                         |                         |           |          |       |        |
| Prophase           | 12 | 1.66±0.21               | 1.55±0.22               | 0.96±0.10 |          |       |        |
| Metaphase          | 13 | 1.37±0.13               | 1.38±0.15               | 0.97±0.09 |          |       |        |
| Anaphase           | 11 | 1.84±0.26               | 1.61±0.17               | 0.92±0.18 |          |       |        |
| Cytokinesis        | 20 | 1.58±0.15               | 1.83±0.18               | 1.20±0.93 |          |       |        |

\*Wild type vs *gpb-1(RNAi)* by Student's *t*-test.

A, anterior; P, posterior.

Data are mean±s.e.m.
