# Supplementary figures and images for: Polarity mediates asymmetric trafficking of the Gβ heterotrimeric G-protein subunit GPB-1 inC. elegansembryos
Source: Oxford University Press journal article supplement (doi:10.1242/dev.063354), 2011-06-07

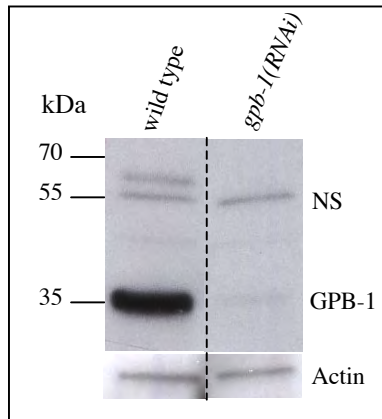

Supplement: dev063354figs1.pdf [file dev063354figs1.pdf]

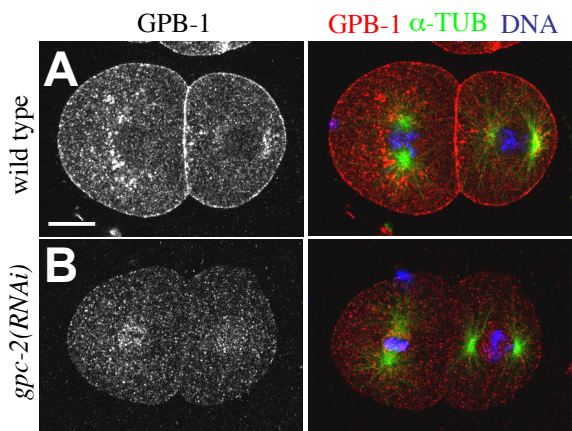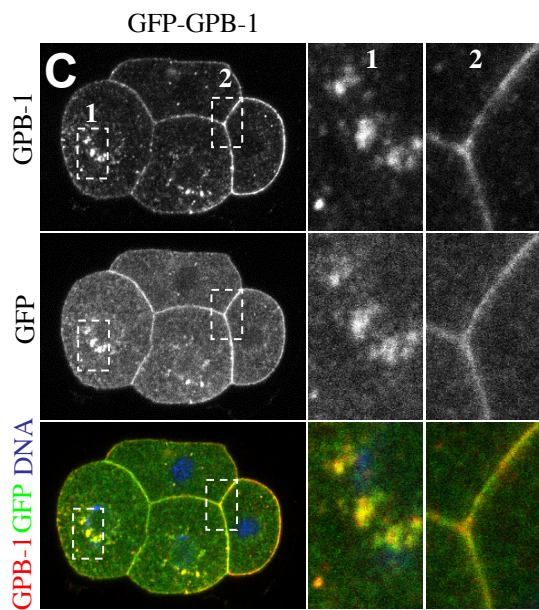

Supplement: dev063354figs2.pdf [file dev063354figs2.pdf]

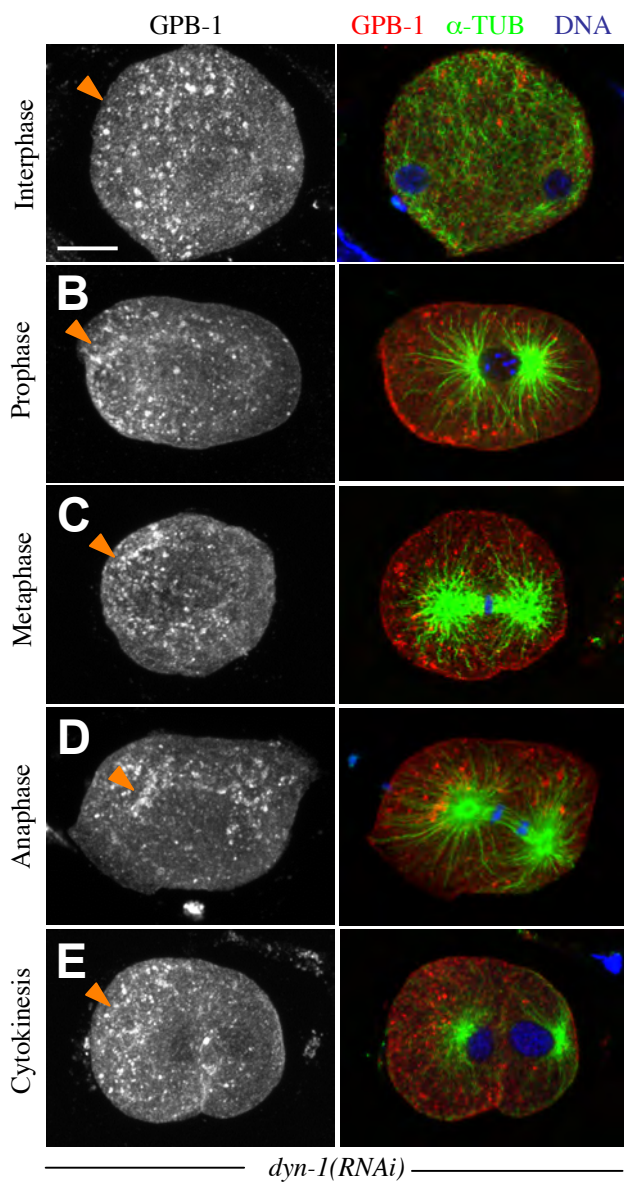

Supplement: dev063354figs3.pdf [file dev063354figs3.pdf]

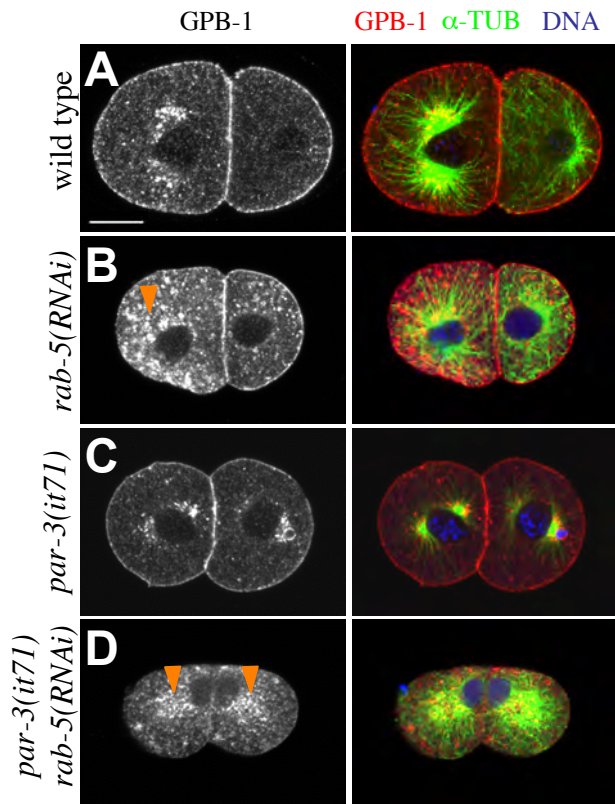

Supplement: dev063354figs4.pdf [file dev063354figs4.pdf]
